# Supplementary material for: In Vitro Anticancer Potential of Jasione montana and Its Main Components against Human Amelanotic Melanoma Cells
Source: MDPI journal article supplement (doi:10.3390/ijms22073345), 2021-03-25
Supplement: s1 [file s1]

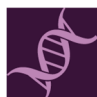

---

## SUPPLEMENTARY MATERIAL

### ***In vitro* anticancer potential of *Jasione montana* and its main components against human amelanotic melanoma cells**

Aleksandra Maria Juszcak, Robert Czarnomysy, Jakub Władysław Strawa, Marijana Zovko-Končić, Krzysztof Bielawski and Michał Tomczyk

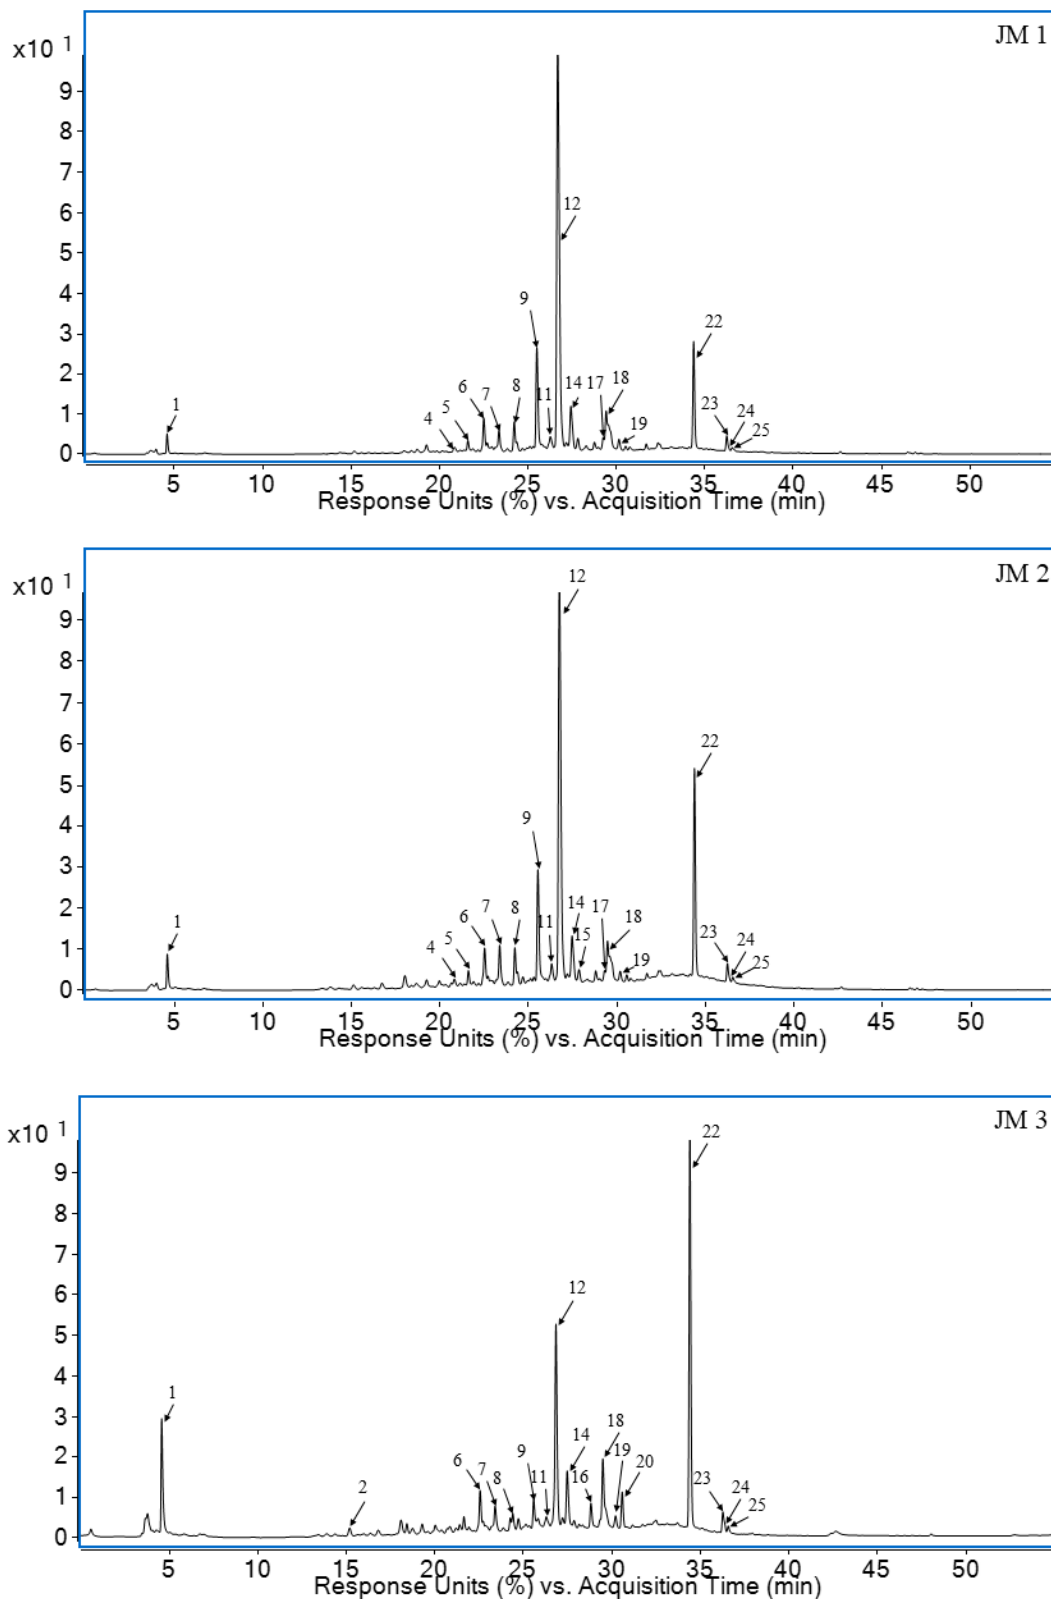

**Figure S1.** The qualitative assessment of *J. montana* extracts (JM1–JM3).  
UV-VIS chromatogram ( $\lambda=280$  nm) obtained by LC-PDA–MS.

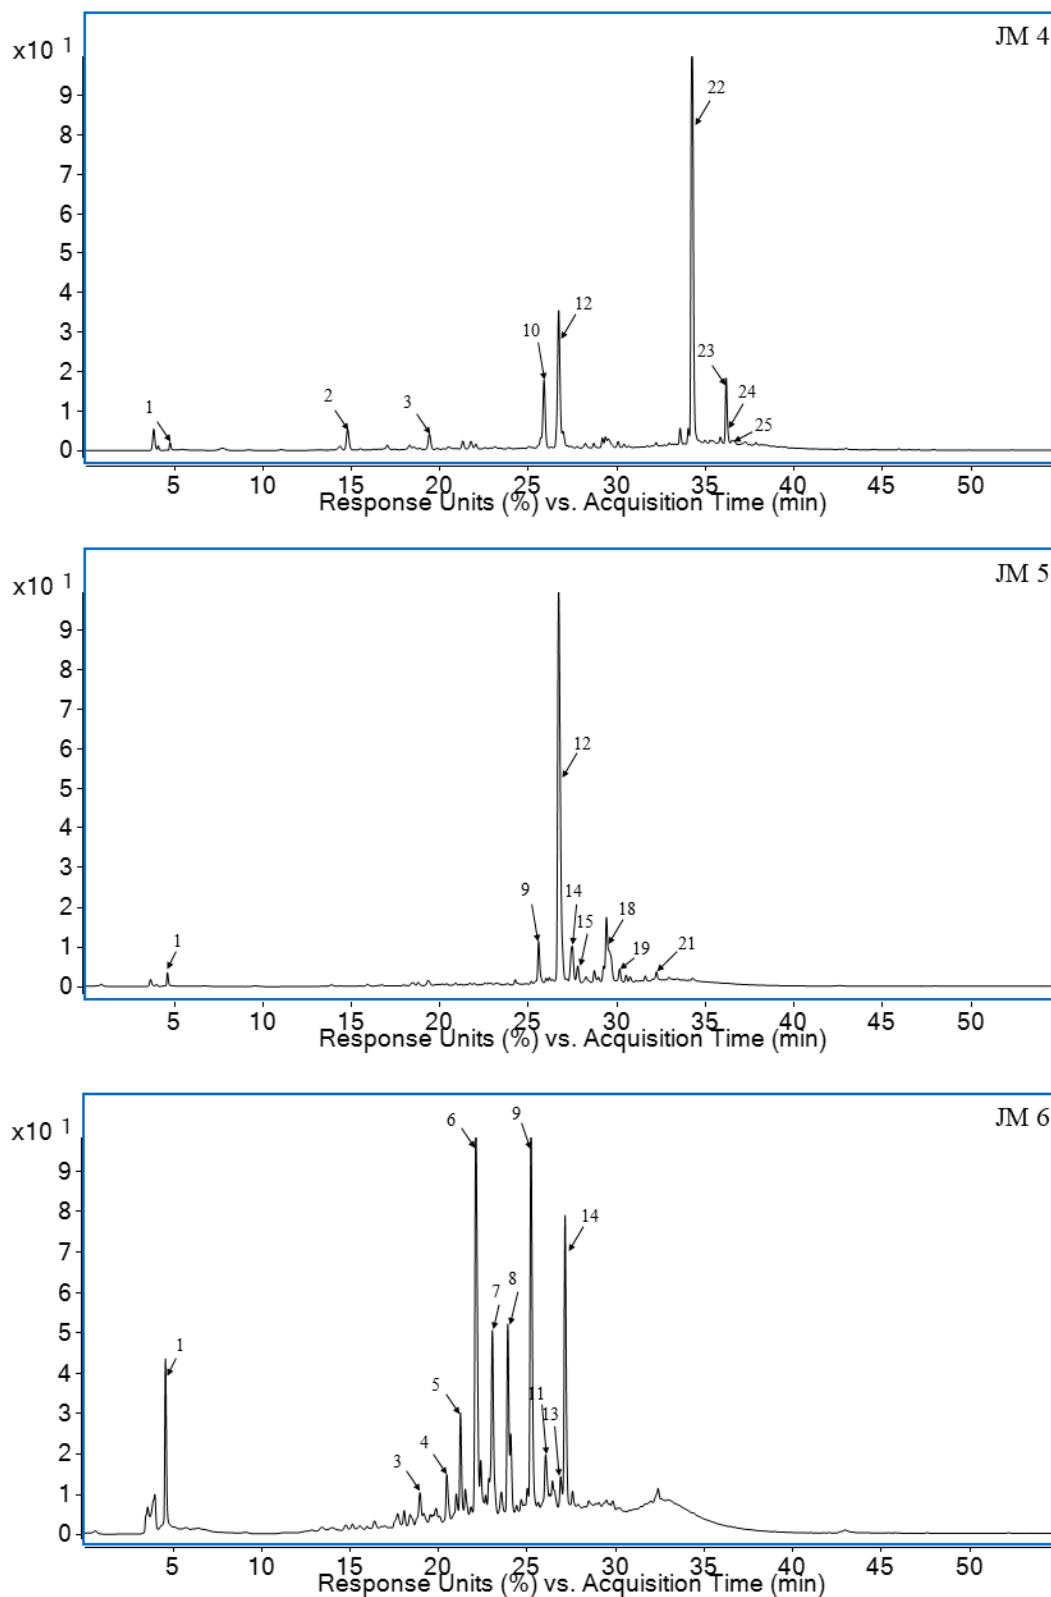

**Figure S2.** The qualitative assessment of *J. montana* fractions (JM4–JM6).  
UV-VIS chromatogram ( $\lambda=280$  nm) obtained by LC-PDA–MS.

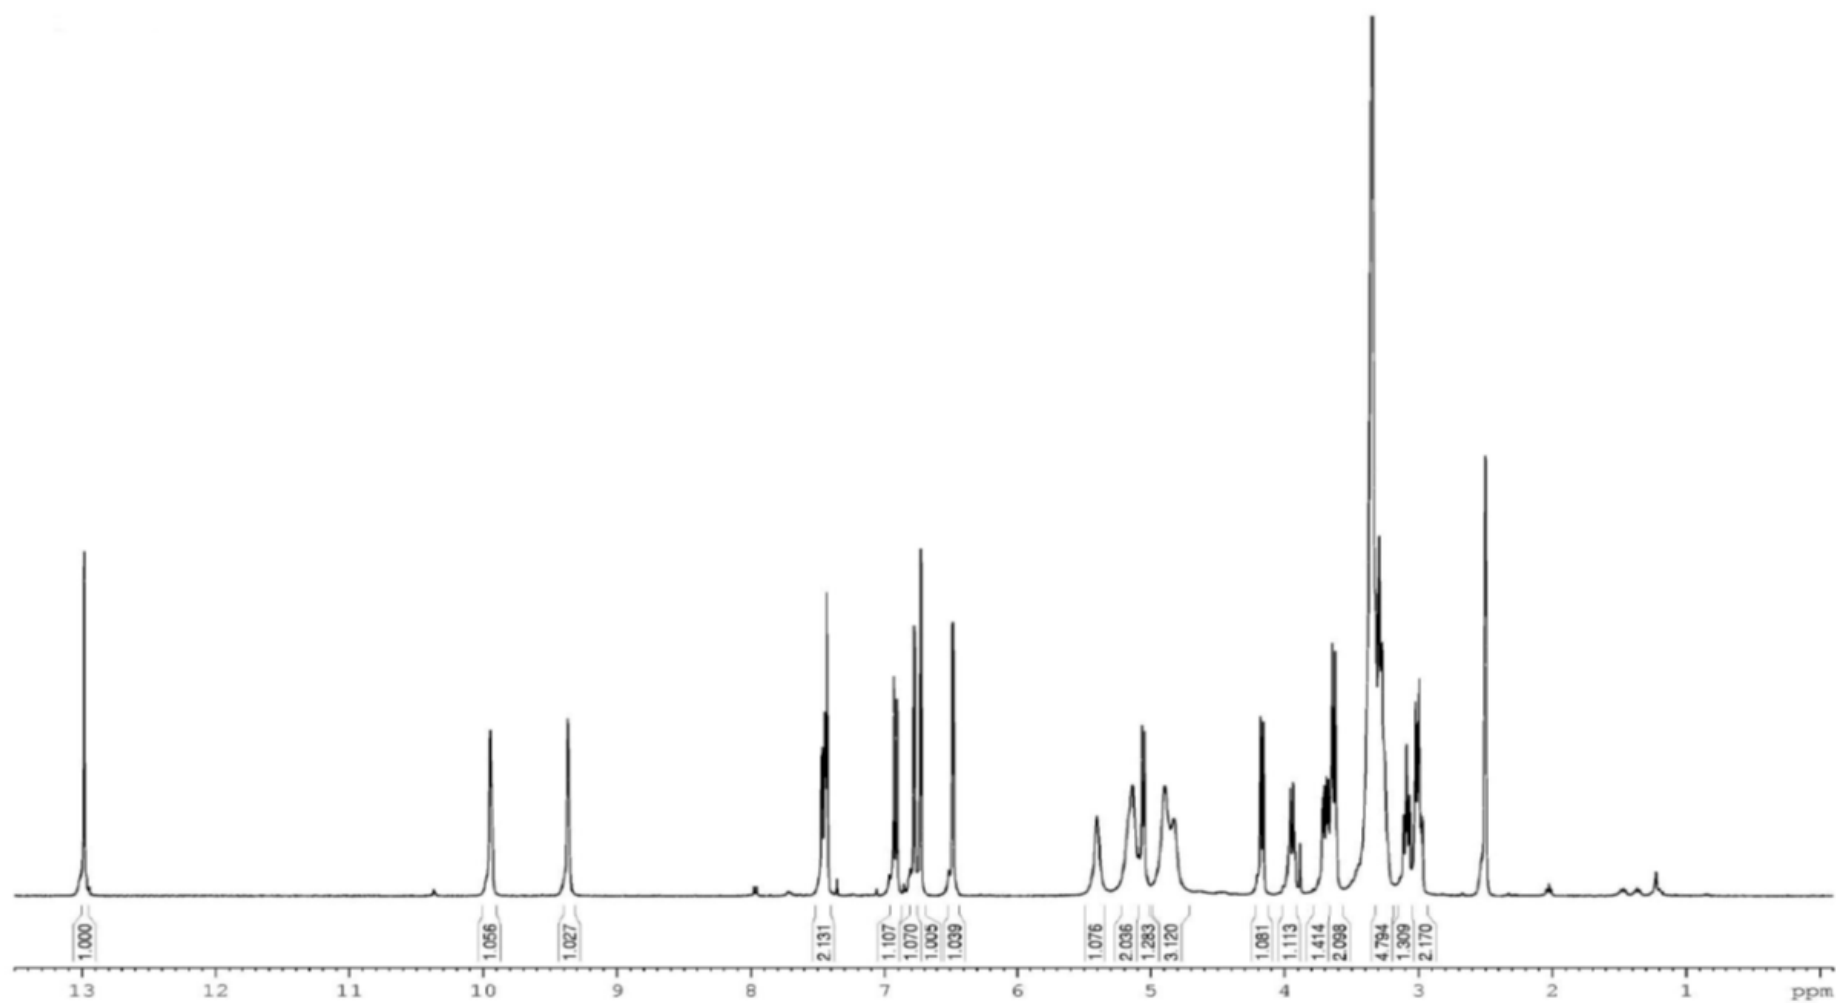

**Figure S3.**  $^1\text{H}$  NMR spectrum (400.15 MHz,  $\text{DMSO}-d_6$ ) of compound 9.

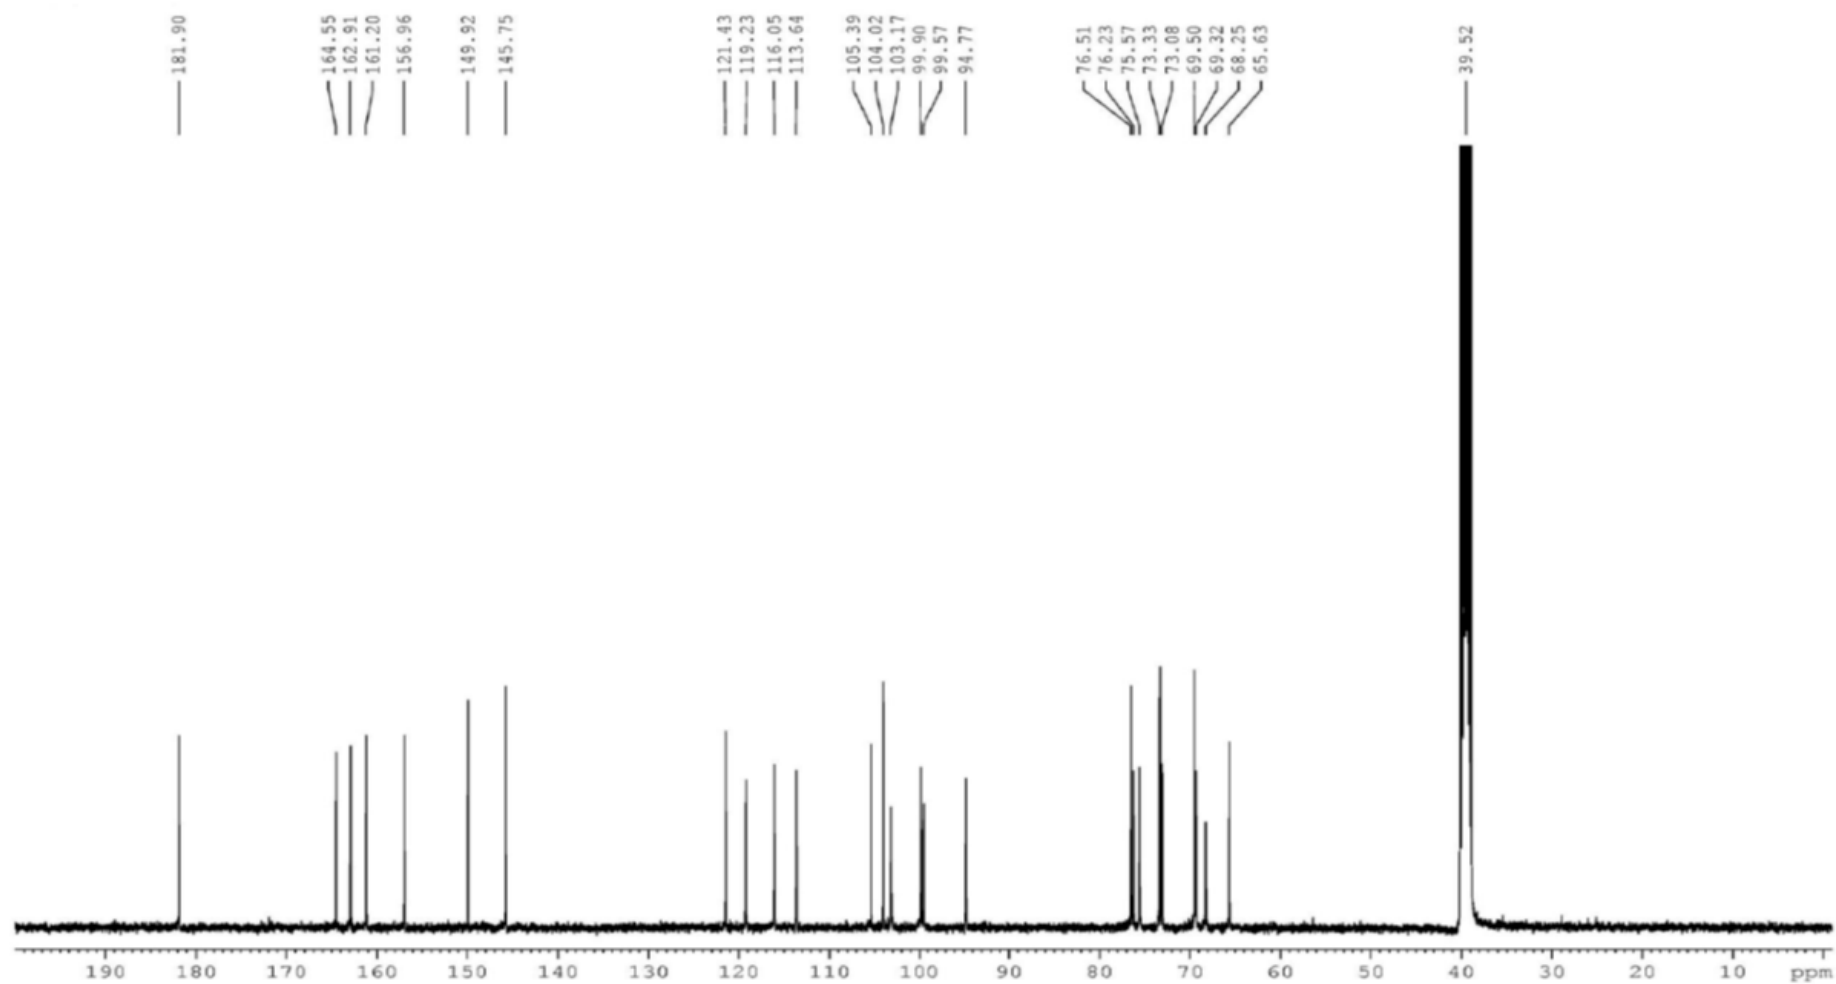

**Figure S4.**  $^{13}\text{C}$  NMR spectrum (400.15 MHz,  $\text{DMSO}-d_6$ ) of compound **9**.

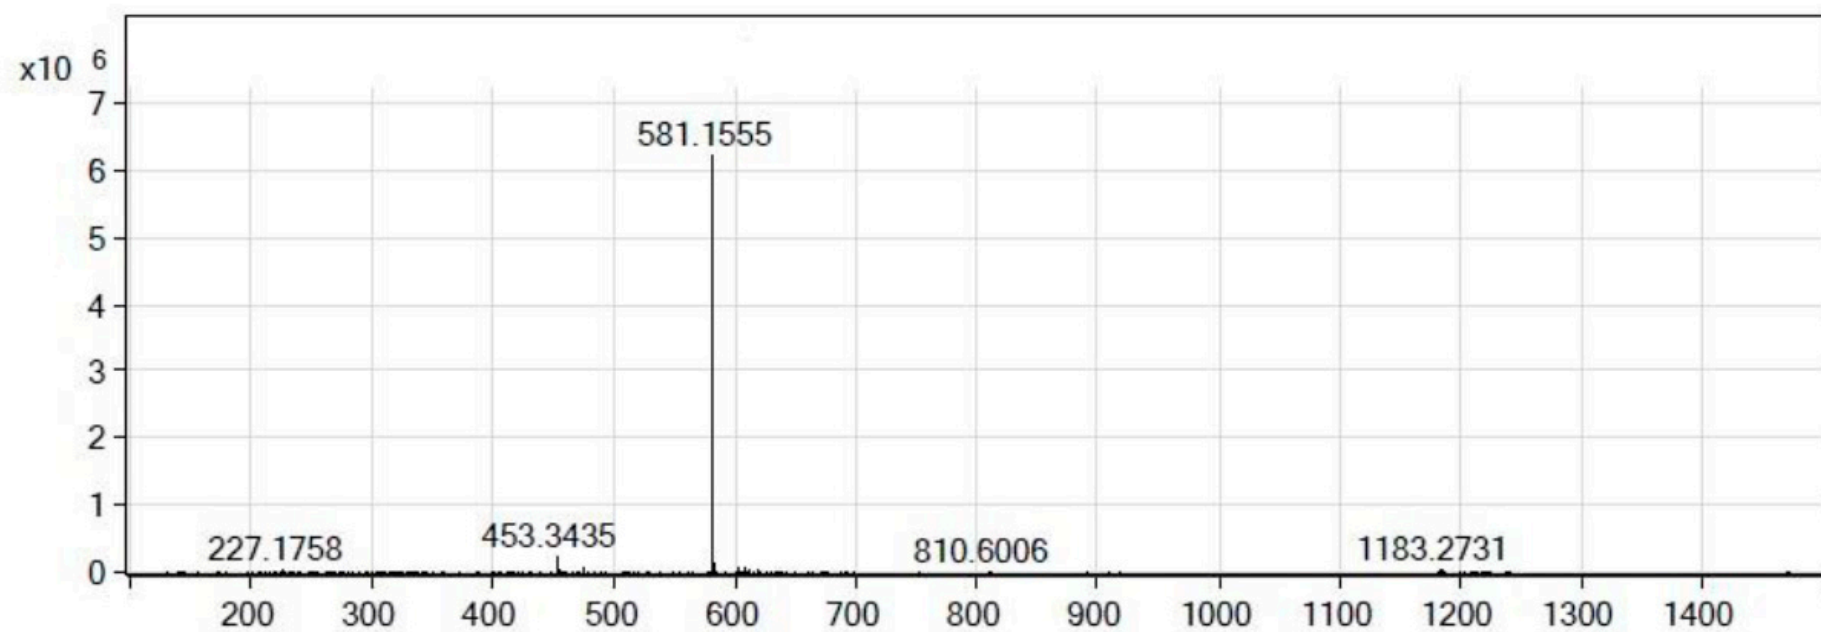

**Figure S5.** The MS spectrum of compound **9** in positive ion mode.

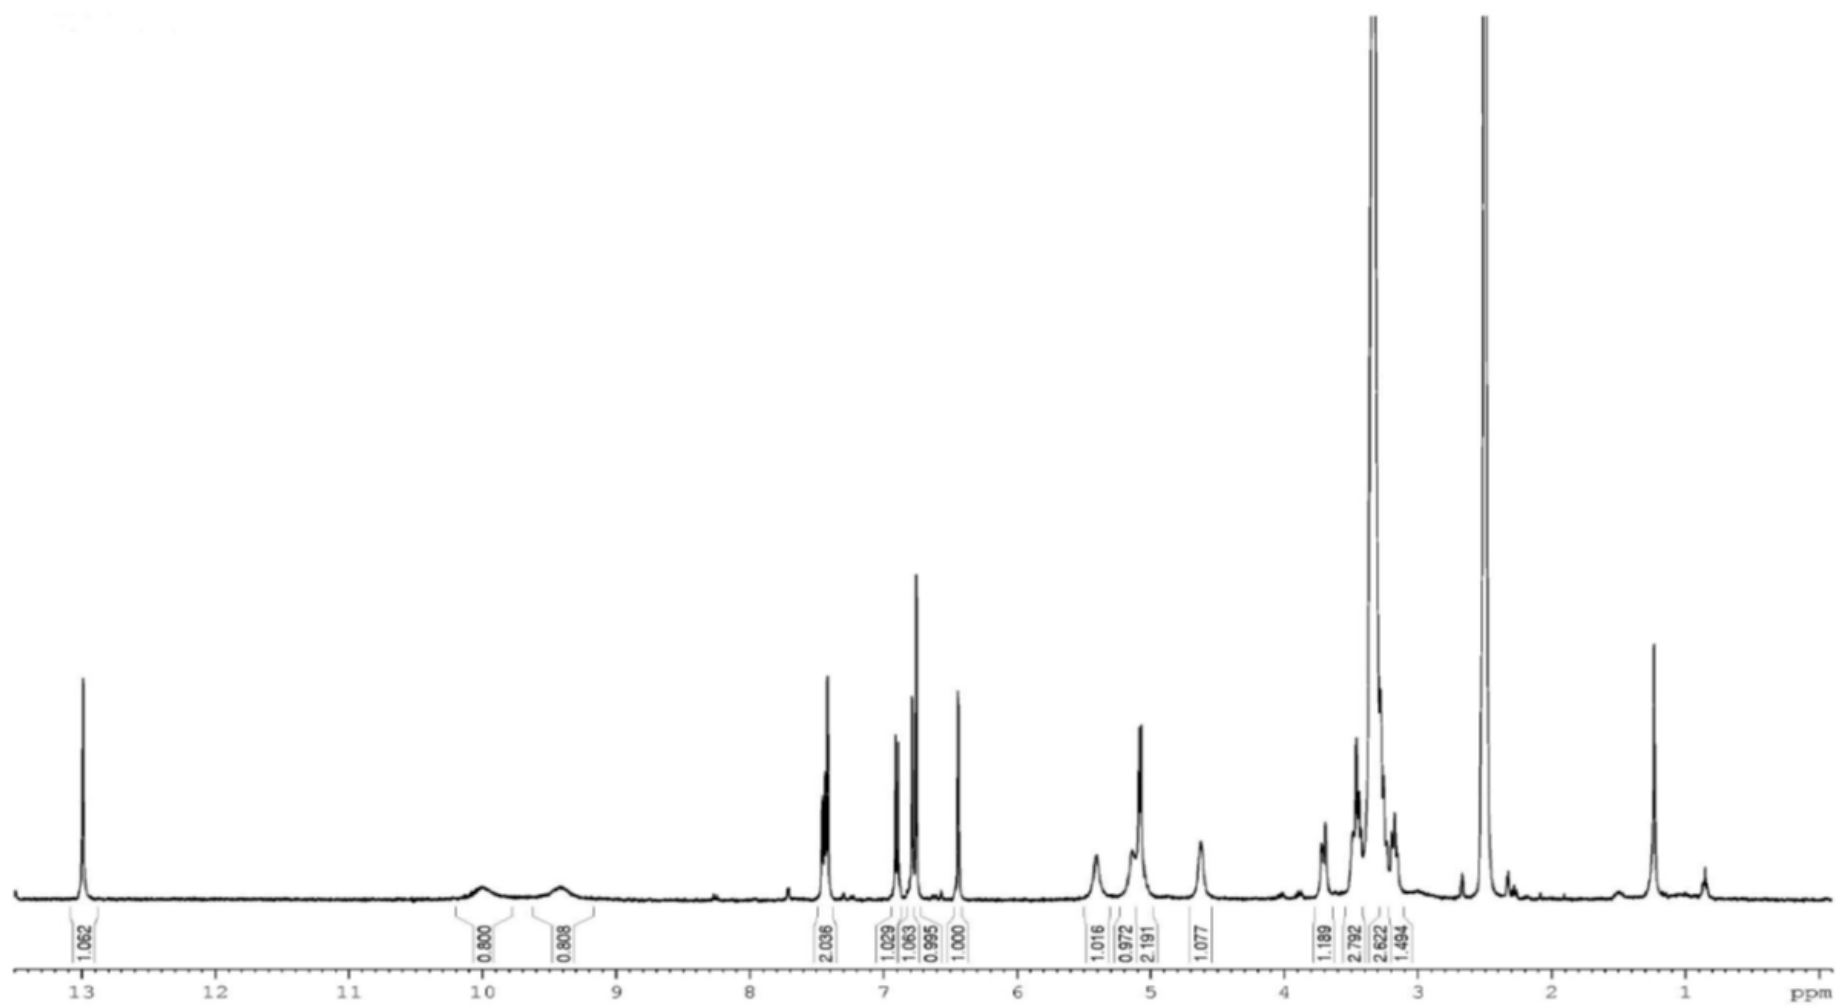

**Figure S6.**  $^1\text{H}$  NMR spectrum (400.15 MHz,  $\text{DMSO}-d_6$ ) of compound 12.

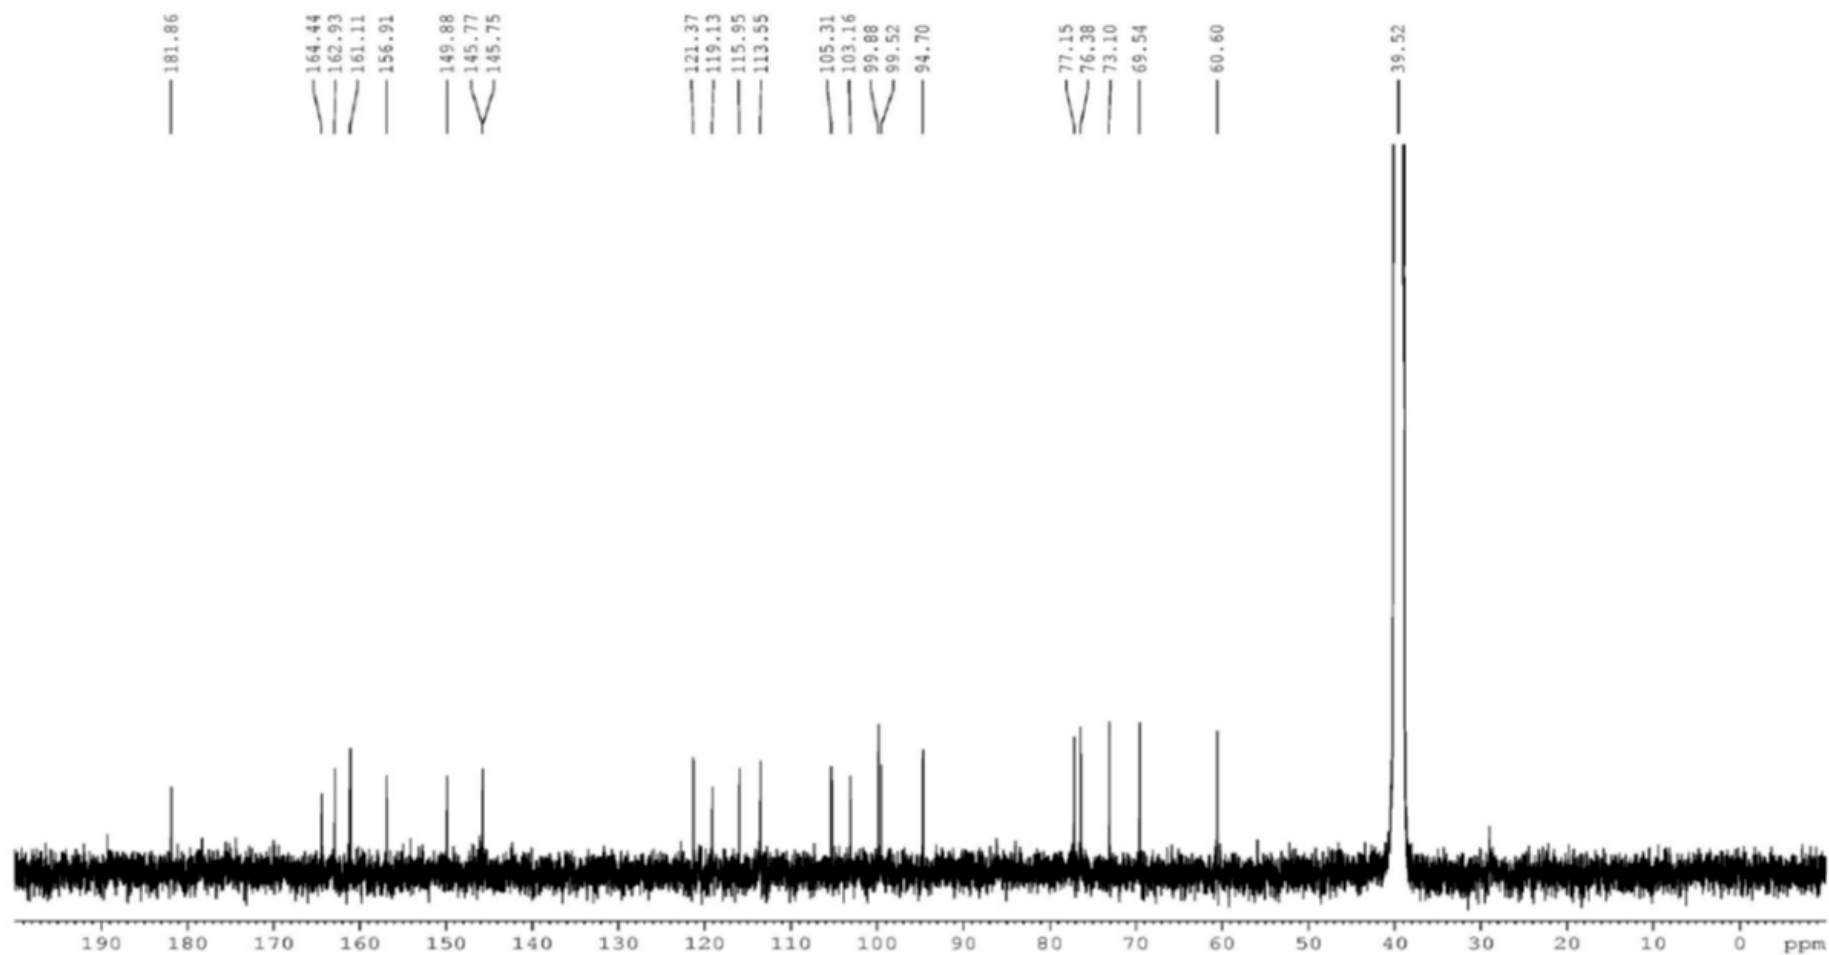

**Figure S7.** <sup>13</sup>C NMR spectrum (400.15 MHz, DMSO-*d*<sub>6</sub>) of compound 12.



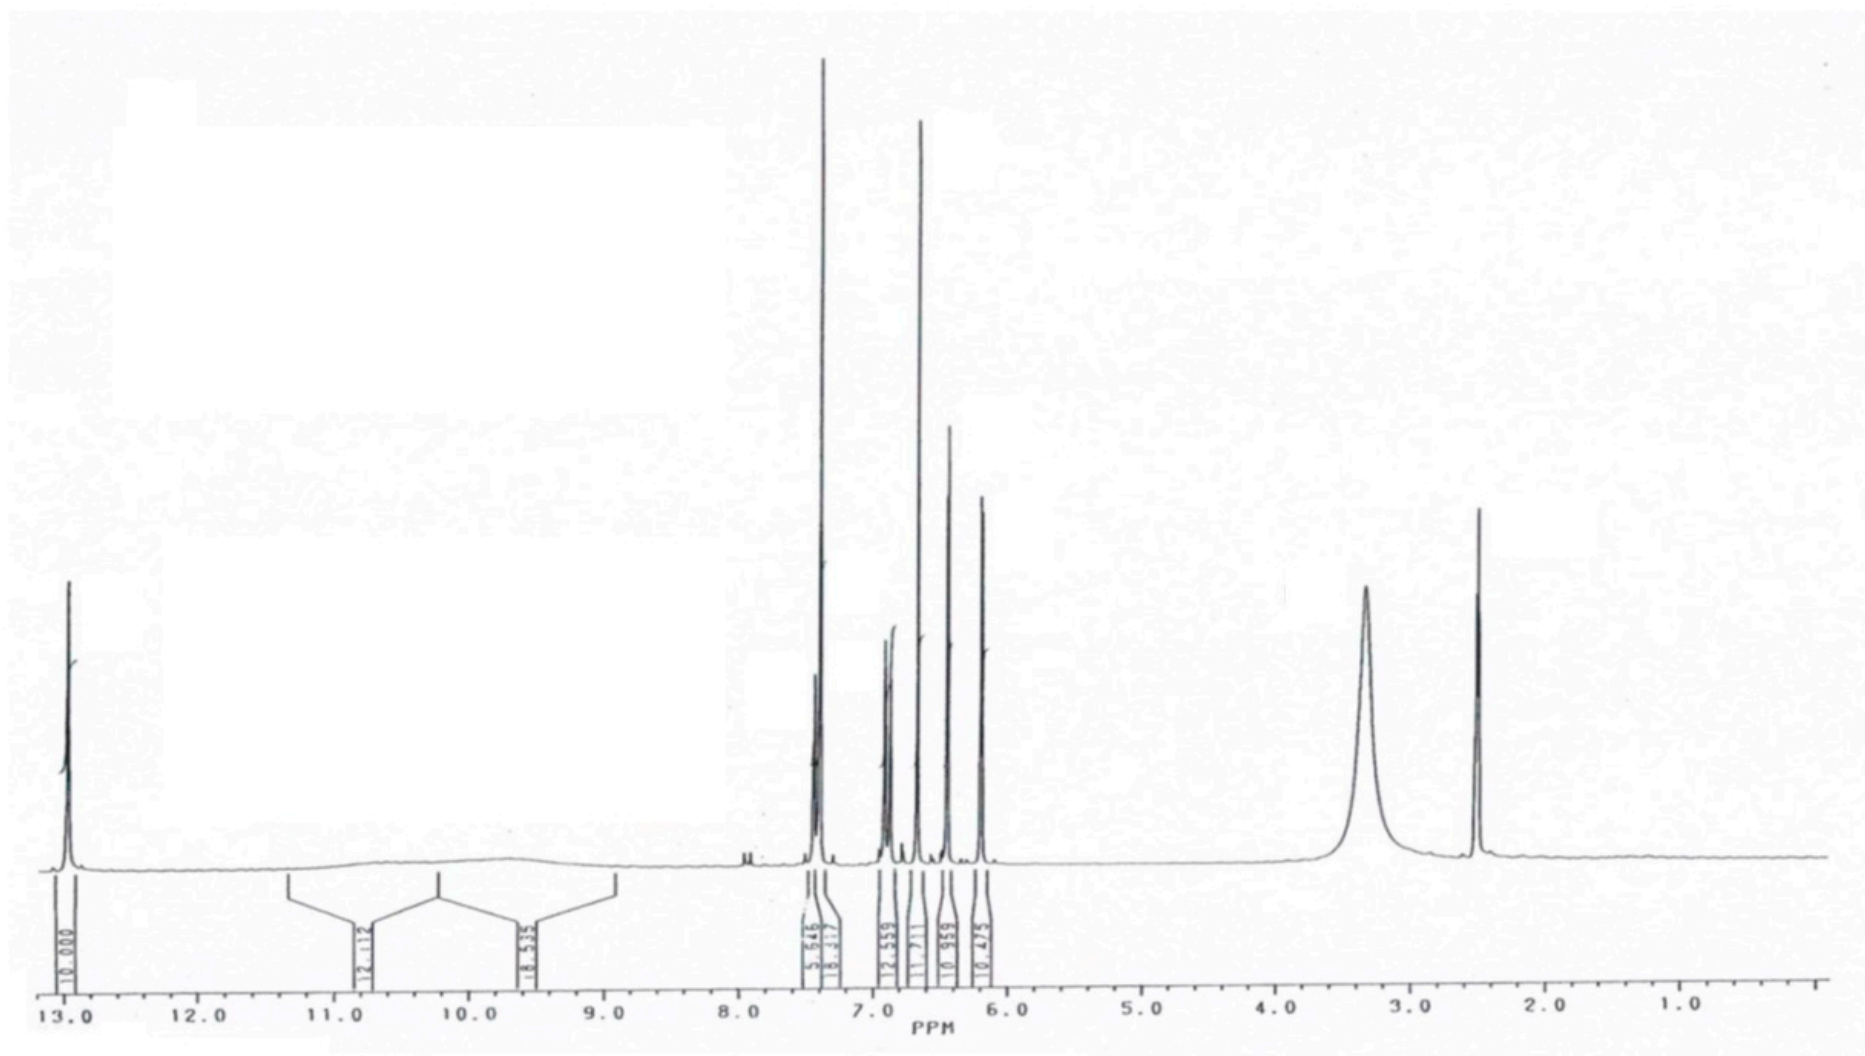

**Figure S8.**  $^1\text{H}$  NMR spectrum (400.3 MHz,  $\text{DMSO-}d_6$ ) of compound 22.

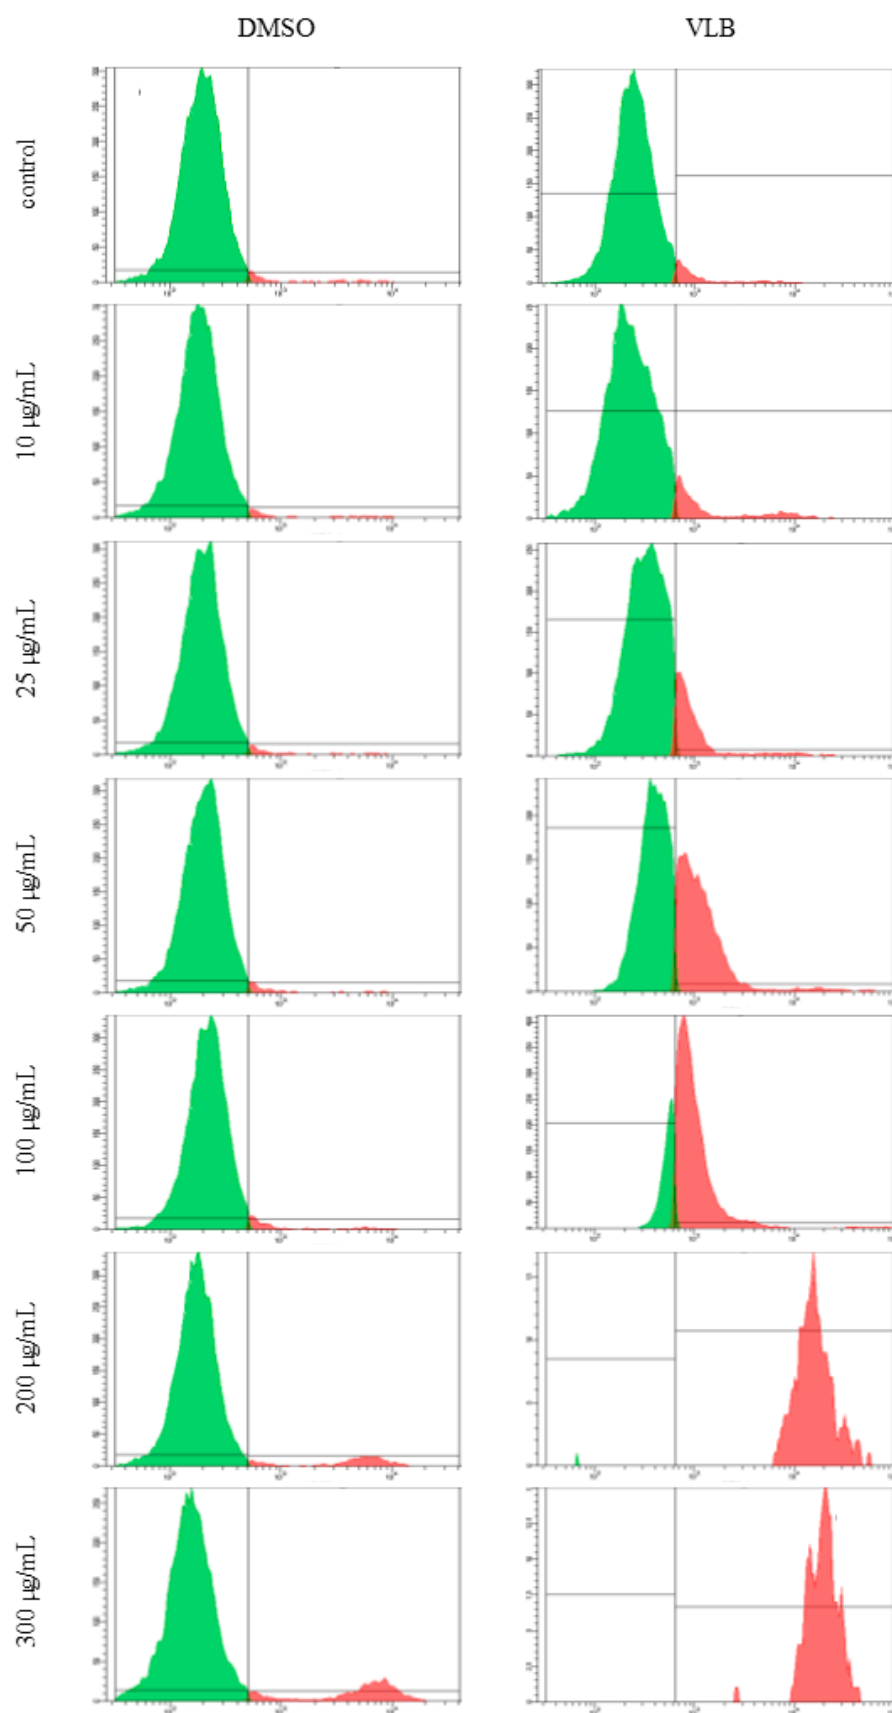

**Figure S9.** Flow cytometric analysis of cytotoxicity of C32 melanoma cells after 24 h of incubation with DMSO and VLB (10, 25, 50, 100, 200, and 300 µg/mL) comparable with untreated control by the Fixable Viability Stain assay.

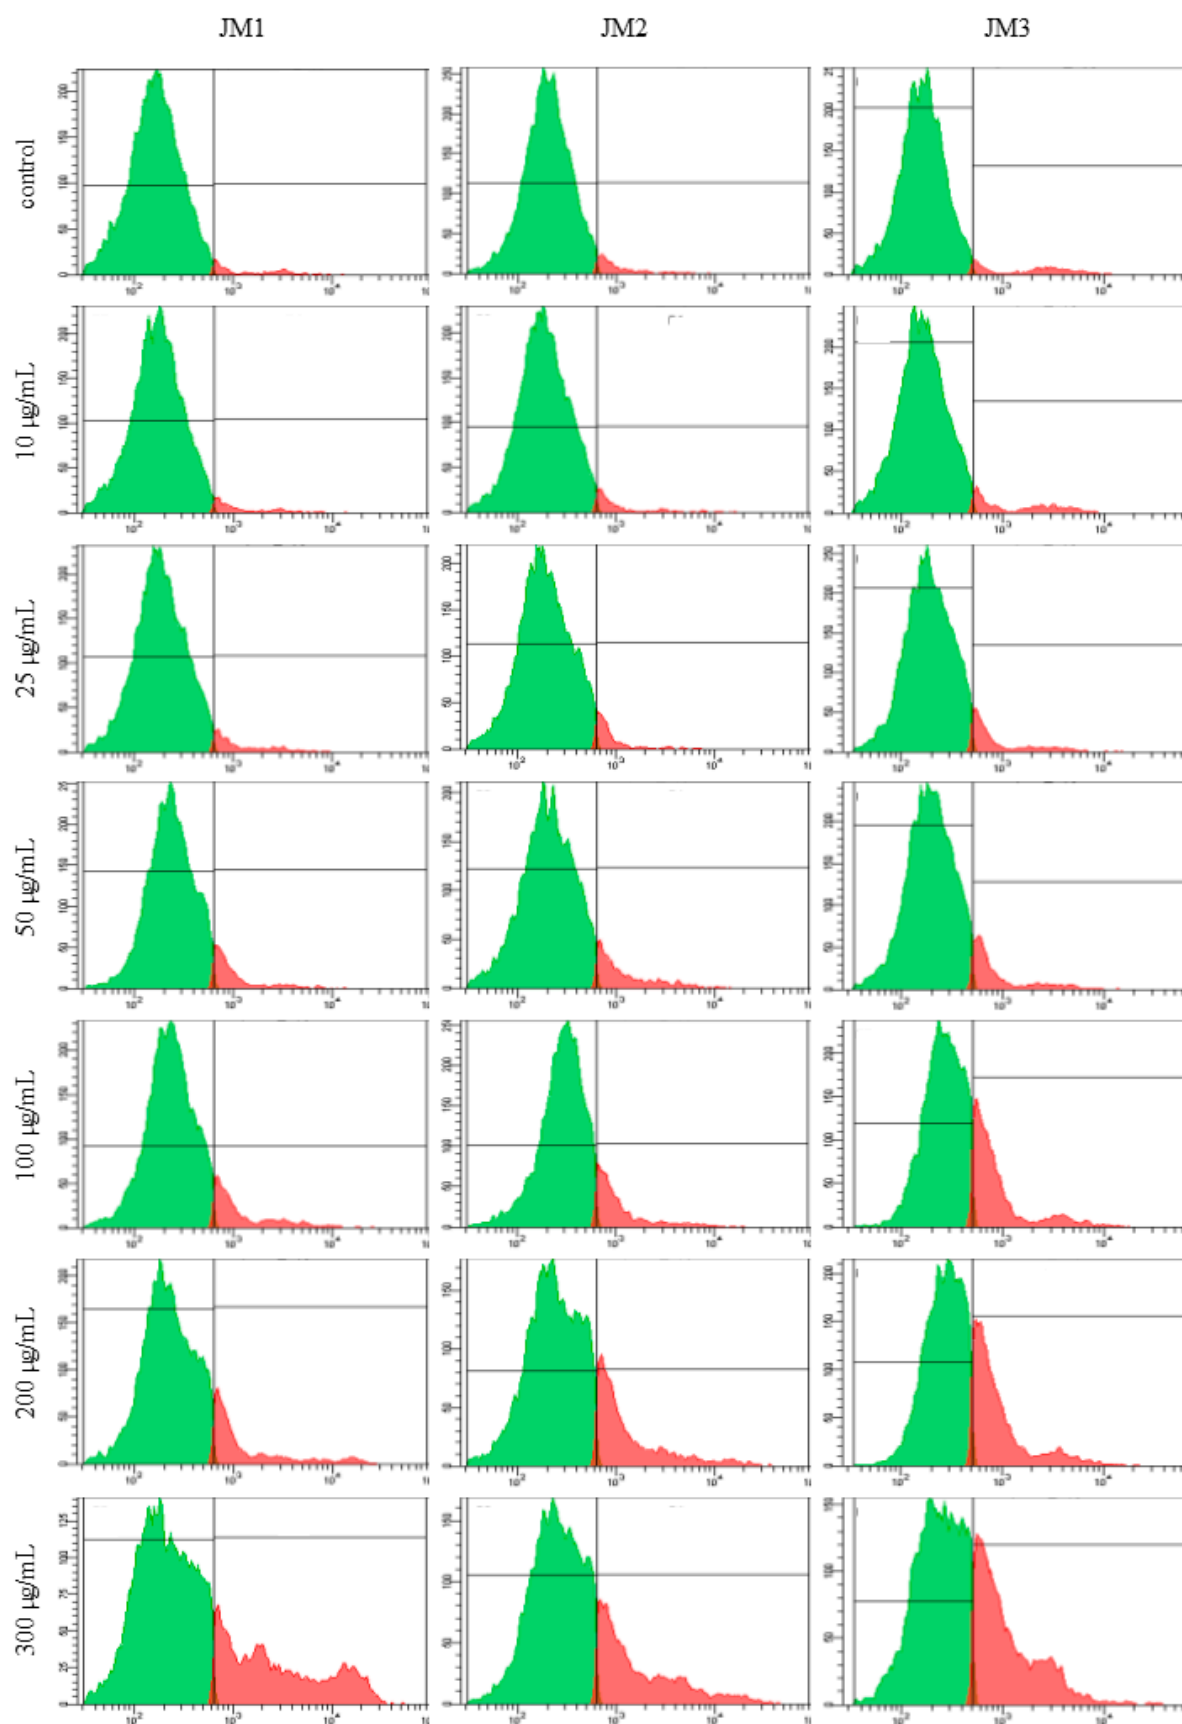

**Figure S10.** Flow cytometric analysis of cytotoxicity of C32 melanoma cells after 24 h of incubation with **JM1–JM3** (10, 25, 50, 100, 200, and 300 µg/mL) comparable with untreated control by the Fixable Viability Stain assay.

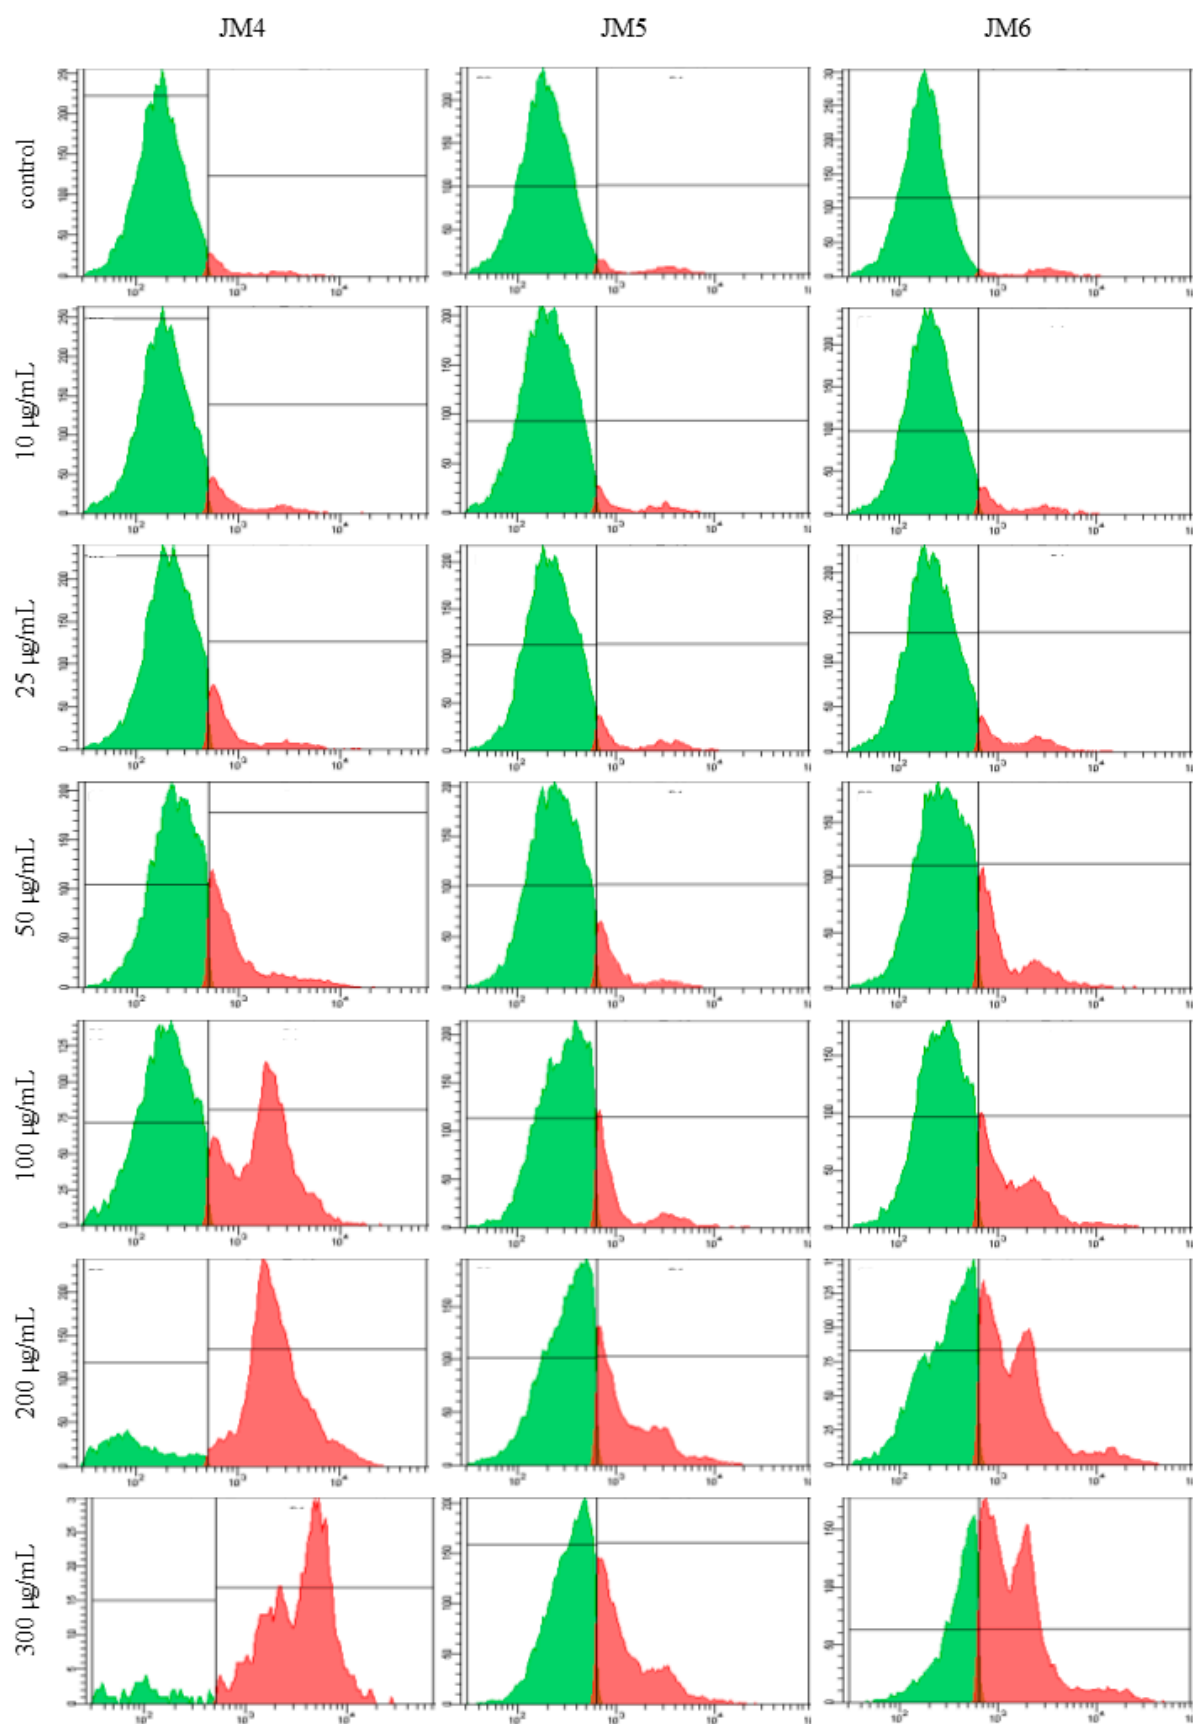

**Figure S11.** Flow cytometric analysis of cytotoxicity of C32 melanoma cells after 24 h of incubation with **JM4–JM6** (10, 25, 50, 100, 200, and 300 µg/mL) comparable with untreated control by the Fixable Viability Stain assay.

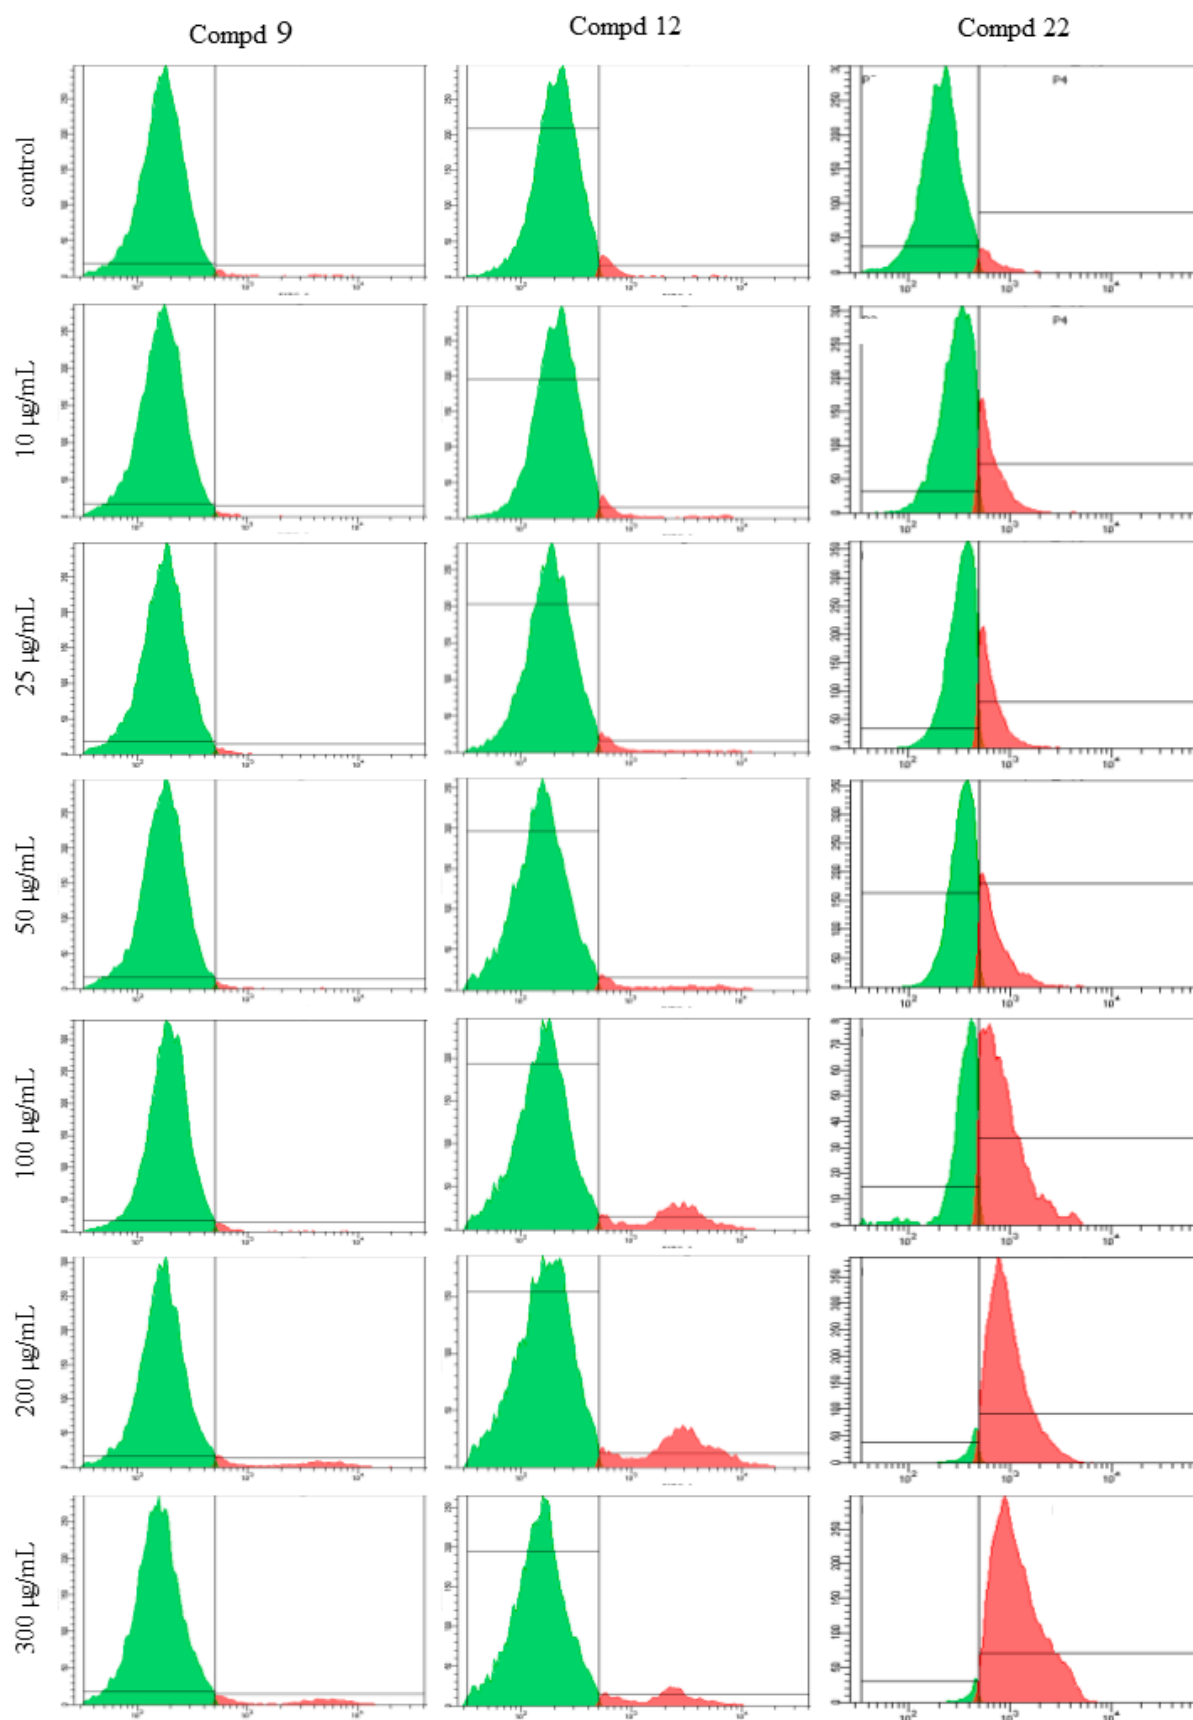

**Figure S12.** Flow cytometric analysis of cytotoxicity of C32 melanoma cells after 24 h of incubation with compound **9**, **12**, and **22** (10, 25, 50, 100, 200, and 300 µg/mL) comparable with untreated control by the Fixable Viability Stain assay.

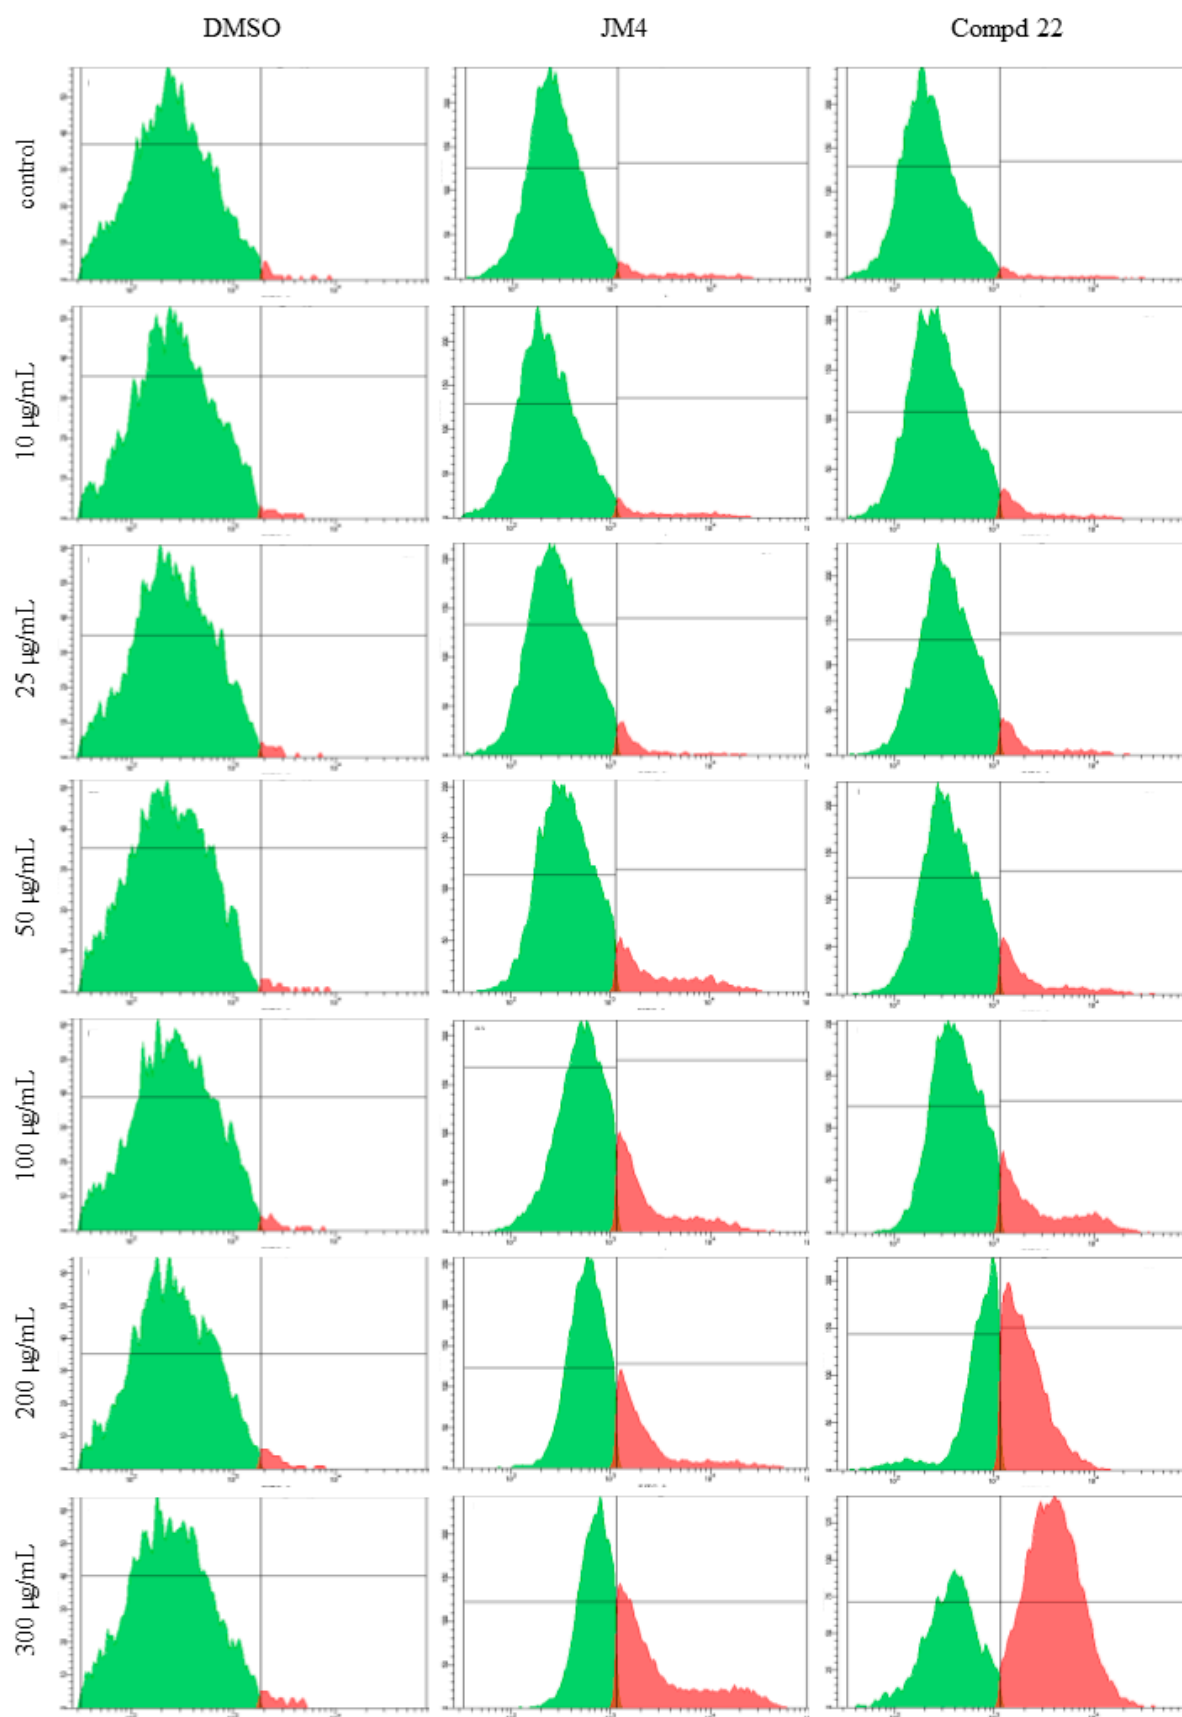

**Figure S13.** Flow cytometric analysis of cytotoxicity of normal human fibroblasts cells after 24 h of incubation with DMSO, **JM4**, and compound **22** (10, 25, 50, 100, 200, and 300 µg/mL) comparable with untreated control by the Fixable Viability Stain assay.
